# Supplementary material for: Evaluating the Endophytic Activities of Beauveria bassiana on the Physiology, Growth, and Antioxidant Activities of Extracts of Lettuce (Lactuca sativa L.)
Source: MDPI journal article supplement (doi:10.3390/plants10061178), 2021-06-09
Supplement: s1 [file s1]

**Table S1.** Correlation between tissue nutrients and anti-oxidant capacity (FRAP and TEAC).

| Nutrients | FRAP                                 | TEAC                                  |
|-----------|--------------------------------------|---------------------------------------|
| Mn        | $R^2 = 0.27$<br>$y = 0.26x + 87.90$  | $R^2 = 0.25$<br>$y = -0.17x + 80.78$  |
| Fe        | $R^2 = 0.13$<br>$y = -1.32x + 495$   | $R^2 = 0.10$<br>$y = -0.76x + 452.76$ |
| Cu        | $R^2 = 0.741$<br>$y = -0.05x + 8.11$ | $R^2 = 0.75$<br>$y = -0.036x + 6.71$  |
| B         | $R^2 = 0.27$<br>$y = -0.12x + 53.14$ | $R^2 = 0.26$<br>$y = -0.07x + 50.03$  |
| C         | $R^2 = 0.88$<br>$y = 0.96x + 316.41$ | $R^2 = 0.87$<br>$y = 0.63x + 341.66$  |

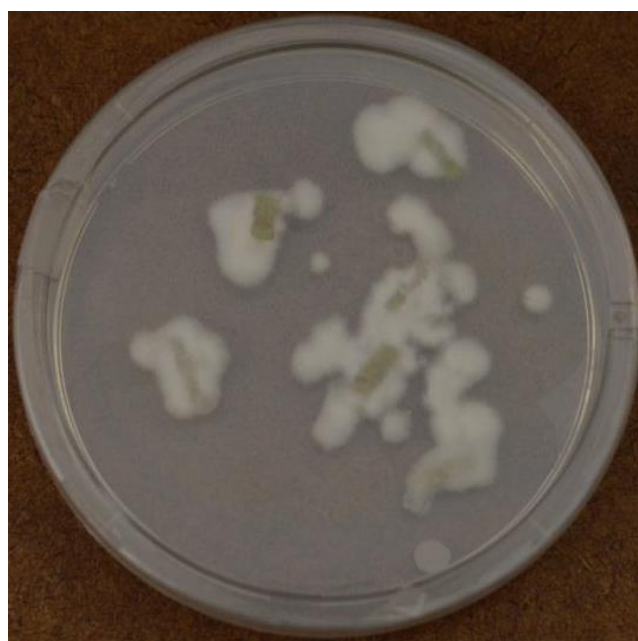

**Figure S1.** Mycelia outgrowth from leaf sections demonstrating successful colonization of tissues by the endophytic fungus *Beauveria bassiana*.
